# Supplementary material
Source: PubMed Central journal article supplement (PMC3105746)
Supplement: ismej2010153x1.pdf [file ismej2010153x1.pdf]

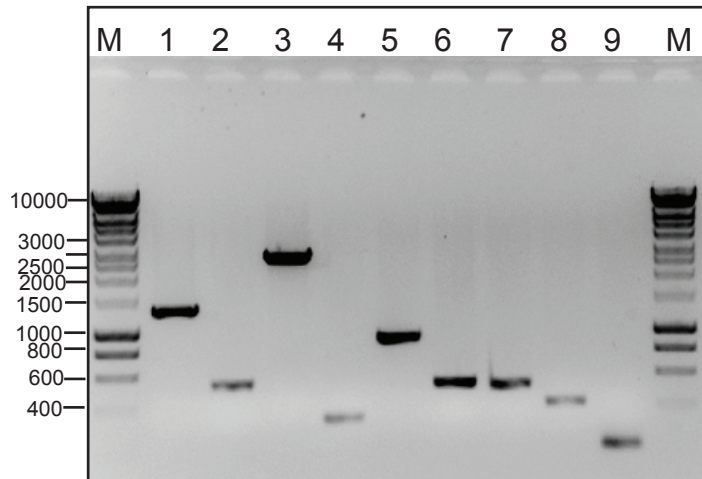

**Figure S1: eDNA isolated from supernatants of static *S. oneidensis* biofilms represents the full chromosome.** PCR was carried out with eDNA as template using primers targeting 1) SO\_0577 (1.2 kbp); 2) SO\_0641 (502 bp); 3) SO\_1066 (2.62 kbp); 4) SO\_1773 (303 bp); 5) SO\_2685 (905 bp); 6) SO\_2882 (504 bp); 7) SO\_2993 (498 bp); 8) SO\_3000 (379 bp); 9) SO\_4405 (179 bp). Afterwards the amplification products were electrophorized on an agarose gel.
