# Supplementary material
Source: PubMed Central journal article supplement (PMC3105746)
Supplement: ismej2010153x2.pdf [file ismej2010153x2.pdf]

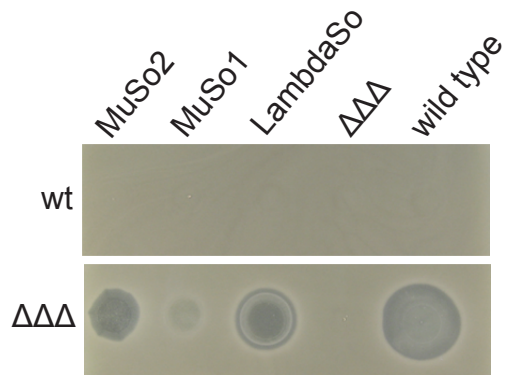

**Figure S2: Detection of phages in the supernatant of planktonic *S. oneidensis* MR-1 cultures.** Cell-free supernatants of 30 hour planktonic cultures of mutant strains exclusively harbouring MuSo2 ( $\Delta\text{Mu}1\Delta\lambda$ , lane 1), MuSo1 ( $\Delta\text{Mu}2\Delta\lambda$ , lane 2) and LambdaSo ( $\Delta\text{Mu}1\Delta\text{Mu}2$ , lane 3), of the phage-less mutant ( $\Delta\Delta\Delta$ , lane 4), and the wild type (lane 5) were spotted on soft agar lawns of wild-type cells (upper panel) and phage-less mutant cells (lower panel).
