# Supplementary material
Source: PubMed Central journal article supplement (PMC3105746)
Supplement: ismej2010153x3.pdf [file ismej2010153x3.pdf]

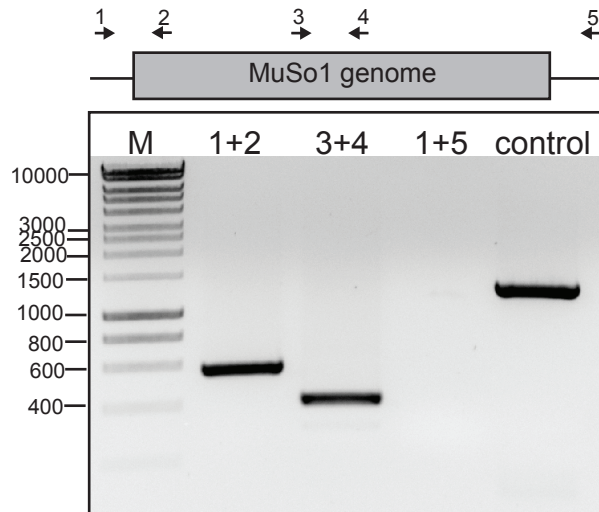

**Figure S3: MuSo1 DNA is not excised during biofilm formation under static conditions.**  $\Delta$ LambdaSo $\Delta$ MuSo2 cells were grown in Petri dishes and the biofilm cells were harvested after 24 hours of incubation and chromosomal DNA was prepared. The upper panel shows a schematic organization of MuSo1 genome within *S. oneidensis* MR-1 chromosome, and arrows and numbers indicate primer pairs used for the analysis. The figure is not drawn to scale. The lower panel displays an agarose gel of electrophorized amplification products. Line 1) Standard Line 2) Primers dMu1-check-fw and dMu-1-up-overlap-rev (570 bp); Line 3) Primers dSO0644-EcoRI-fw and dSO0644-KpnI-rev (393 bp); Line 4) Primers dMu1-check-fw and dMu1-check-rev (1.1 kbp if MuSo1 is deleted), ; Line 5) Primers SO0577-Seq-fw and SO0577-Seq-rev (1.2 kbp). An excision of MuSo1 would result in a product of 1.1 kbp in size. No product could be amplified, suggesting that MuSO1 may only be excised in a very small fraction of the cells.
