# Supplementary material
Source: PubMed Central journal article supplement (PMC3105746)
Supplement: ismej2010153x4.pdf [file ismej2010153x4.pdf]

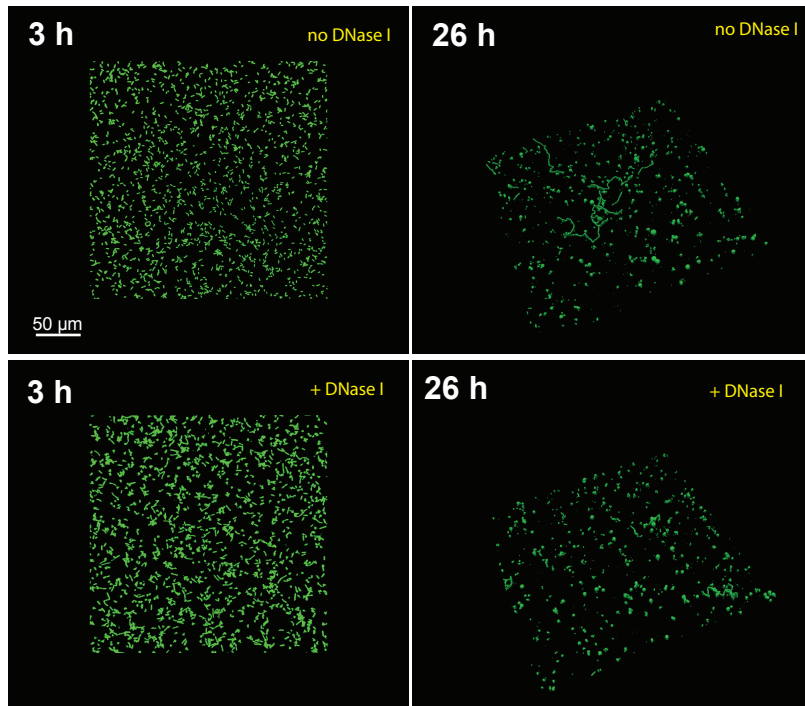

Figure S4: DNase I treatment has no effect on biofilm formation of *S. oneidensis* phage-less mutants. Gfp-tagged cells were incubated under hydrodynamic conditions. After 1 and 24 hours of incubation biofilms were treated with DNase I and analyzed by CLSM after 2 hours of incubation (lower panel). Micrographes in the upper panel display the control experiment (non-treated biofilms).
