# Supplementary material
Source: PubMed Central journal article supplement (PMC3105746)
Supplement: ismej2010153x5.pdf [file ismej2010153x5.pdf]

## Construction of *gfp*-tagged *Shewanella* strains

Since a previously used Tn7 delivery system for *gfp* tagging (Lambertsen *et al.*, 2004) is based on vectors that are stably maintained in *Shewanella oneidensis* MR-1, we constructed a modified delivery system. To that end, pBK-miniTn7-*gfp3* (Lambertsen *et al.*, 2004) was digested with NotI, releasing a fragment harboring constitutively expressed *egfp* and a chloramphenicol resistance cassette. This fragment was subsequently ligated into the NotI site of the Tn7 delivery vector pUC18-R6KT-miniTn7T (Choi *et al.*, 2005) that, in contrast to the previously used delivery vectors, does not replicate in *S. oneidensis* MR-1. The resulting plasmid pUC18-R6KT-miniTn7T-*egfp* was used for tagging *S. oneidensis* strains by three-parental mating from the DAP-auxotroph *E. coli* WM3064 together with *E. coli* WM3064 harboring the helper plasmid pTNS2. Selection for tagged *S. oneidensis* strains was carried out using LB plates containing chloramphenicol but lacking DAP. Fluorescence of the strains was determined by fluorescence microscopy using an upright Zeiss Image MI (Oberkochen, Germany) equipped with a Cascade 1K camera (Visitron Systems, Puchheim, Germany) and a Zeiss Plan Apochromat 100×/1.4 differential interference contrast objective. Comparative growth and biofilm experiments ensured that no detrimental effects based on fluorescent protein expression occurred. The Gfp-tagged strain also served as host strain for introducing targeted gene disruptions.

Choi KH, Gaynor JB, White KG, Lopez C, Bosio CM, Karkhoff-Schweizer RR, and Schweizer HP. (2005). A Tn7-based broad-range bacterial cloning and expression system. *Nature Methods* **2**: 443-448.

Lambertsen L, Sternberg C, and Molin S. (2004). Mini-Tn7 transposons for site-specific tagging of bacteria with fluorescent proteins. *Environ. Microbiol.* **6**: 726-732.

**Heterologous production of SO\_2685 (predicted major head subunit of MuSo2) and SO\_2963 (predicted major capsid protein of LambdaSo).**

Genes to be overexpressed were amplified from template genomic DNA using primers listed in Supplemental Table 2. The resulting PCR products were ligated in-frame into pASK-IBA3plus (IBA GmbH, Göttingen, Germany).

Overproduction of SO\_2685 and SO\_2963 was conducted in *E. coli* DH5 $\alpha$   $\lambda$ pir harbouring the corresponding expression vector. Gene expression was induced by adding anhydrotetracycline (Sigma-Aldrich, Taufkirchen, Germany) at a final concentration of 200 ng• ml<sup>-1</sup> to exponentially growing cultures followed by incubation for 4 h at 37°C.

For purification of the recombinant proteins, cell sediments were resuspended in lysis buffer (10 mM HEPES, 150 mM NaCl, 0.5 mg• ml<sup>-1</sup> lysozyme, pH 7) and lysed by a French Press (SLM-AMINCO/Spectronic) three times at 18,000 p.s.i. These steps were repeated twice. Inclusion bodies were finally harvested by centrifugation at 1,000 x g for 30 min and stored at -20°C. The total protein concentration was determined via Bio-Rad Protein assay (Bio-Rad Laboratories GmbH, Munich, Germany) following the manufacturer's instructions.

SO\_2685 and SO\_2963 inclusion bodies were resuspended in sample buffer {Laemmli, 1970 #5437}, heated at 99°C for 5 min and resolved by SDS-PAGE on a 11 % polyacrylamide gel. The relevant band was excised from gels stained with 0.1% Coomassie dye in water.

**Table S1: Sequence of primers used in this study**

| <b>Primer name</b>                   | <b>Sequence</b>                      |
|--------------------------------------|--------------------------------------|
| <u>in-frame deletions</u>            |                                      |
| <b>ΔMuSo1</b>                        |                                      |
| dMu-1-up-EcoRI-fw                    | CGAATTCTCGGTGCTAAGGTGATTGC           |
| dMu-1-up-overlap-rev                 | AGGTTATAGCTTAGTTAGCTCACAATGTTAATACGA |
| dMu-1-dwn-overlap-fw                 | CTAACTAAGCTATAACCTTGCTCCAGCACC       |
| dMu-1-dwn-PstI-rev                   | CGACTGCAGCAATGACGGGCTGATATTTG        |
| dMu1-check-fw                        | GCGAAACCGTTTTGATACAC                 |
| dMu1-check-rev                       | CGAAGACTCTATCTACAGGCCAA              |
| <b>ΔMuSo2</b>                        |                                      |
| dMu-2-up-PstI-fw                     | ACCCTGCAGTGTTCCGGAC                  |
| dMu-2-up-overlap-rev                 | AAGCTTGCCCGATCCCGTTTACATCCTACA       |
| dMu-2-dwn-overlap-fw                 | ACGGGATCGGGCAAGCTTATTTCTTCGCTT       |
| dMu-2-dwn-BamHI-rev                  | CGGATCCTCGAATGTGACCGTTGTGG           |
| dMu2-check-fw                        | GCCTGATAACGACAAACAAATTT              |
| dMu2-check-rev                       | CCCAGTTTGTGAAGGTTATGAG               |
| <b>ΔlambdaSo</b>                     |                                      |
| dlambda-up-EcoRI-fw                  | CGAATTCAATTGCTTTAGCCGAGGCA           |
| dlambda-up-overlap-rev               | AATGAGTGAGGTAAGCTTTTCGTTGTTGG        |
| dlambda-dwn-overlap-fw               | AAGCTTACCTCACTCATTAGTATCTTGCTCTTCTGA |
| dlambda-dwn-PstI-rev                 | CGACTGCAGGCGGATTTCAAGTGTTCAG         |
| dlambda-check-fw                     | TGAAAGCGCACATTTCCA                   |
| dlambda-check-rev                    | GAAACCCTTGTCGGTGAAAA                 |
| <b><u>lacZ-reporter fusion</u></b>   |                                      |
| LacZ-fw-Pst/Hind                     | GTCGACCTGCAGCCAAGCTTGCTCCCGTCGT      |
| LacZ-rv-XhoI                         | CATACTCGAGTTCCTTACGCGAAATACGGGCAGAC  |
| Pmot-fw-Hind                         | GCTTGGATCCGAGGAGCTGTATCTTCGAGTGTAC   |
| Pmot-rv-Bam                          | TAAAGGATCCTGGTTACCAGCAACGTTAATGGAG   |
| <b><u>Protein overproduction</u></b> |                                      |
| SO2963-EcoRI-fw                      | CGAATTCCCAAACCCAAATTTT               |
| SO2963-PstI-rev                      | CGACTGCAGGGCAAAGTAAAGTTAC            |
| SO2685-EcoRI-fw                      | CGAATTCGCTACTGAAGCACAAGT             |
| SO2685-NcoI-rev                      | GACCATGGGCAGTAACTAAAGGC              |

**q-PT-PCR**

dSO2653- qPCR -fw GATCACCTCTCACGCGCAT  
dSO2653- qPCR -rev GCGTATTGAAATGTCACCTATTGA

SO2658-qPCR-fw GTAAAGCCATTGAGGTTGACCT  
SO2658-qPCR -rev CTAACAAAAGCCGCCGC

SO2985-qPCR-fw CCACCCGACTCTCACGAT  
SO2985-qPCR -rev GGTGAAAGCAGATTTGGAAGAT

SO2999-qPCR-fw GGCCATATTGTGGCAGATAAA  
SO2999-qPCR-rev CTTATCTTTTAACCAAGAAACGGTG

recA-Q-PCR-651-for TCACATCAACCGCACCAGAACG  
recA-Q-PCR-781-rev CGCTCTTGATCCTATCTACGCG

**PCR with eDNA**

SO0577-Seq-fw CGCAACGGTACTATATCCACTCG  
SO0577-Seq-rev CGATAATGGCGTTCATCGGCG

dSO0641-up-EcoRI-fw CGAATTCGGATGGTTCGTATGGTGTCTG  
dSO0641-up-overlap-rev AAGAAAGTGCGGTAAGGACGTGAAGTAATTCTCA

SO1066-XmaI-fw GACCCGGGGAAAATGTTAATAAGTTAACAGCTGTT  
SO1066-NcoI-rev GACCATGGATAACGGCGACGACGTTG

SO1773-up-EcoRI-fw CGAATTCTGCAATTCCTTTTTATGCACTG  
SO1773-up-NdeI-rev CGTACATATGGTTTGTATCTAGGGCAACTGCTTG

SO2685-EcoRI-fw CGAATTCGCTACTGAAGCACAAGT  
SO2685-NcoI-rev GACCATGGGCAGTAACTAAAGGC

dSO2882-up-EcoRI-fw CGAATTCGGTAGCGCCTGGACTTGG  
dSO2882-up-overlap-rev TAAATACCAGCGCTTTTGGTAATGCTCG

SO2993-BamHI-fw CGGATCCCCCGTCACCTCCTTCTGTT  
SO2993-SphI-rev GAGCATGCCTTATTTTGTATTGTCACAATTACCGA

dSO3000-EcoRI-fw CGAATTCGGTTGGATGTTGCCAGGT  
dSO3000-KpnI-rev GAGGTACCCGTTATCAAACAACCAATTGCTAC

SO4405-up-EcoRI-fw CGAATTCGGGATATTCCTTTACTTATGGCTAAC  
SO4405-up-NdeI-rev CGTACATATGGCTTAACTCTGAAATGTTGTCATGTT

**PCR using ΔMuSo1 DNA**

dSO0644-EcoRI-fw CGAATTCGCGTGAAAAGTTATGGCTAAAA  
dSO0644-KpnI-rev CGATAATGGCGTTCATCGGCG
